# Supplementary material
Source: Springer Nature journal article supplement (https://www.springermedizin.de/resource/supplementary/12885_2013_4232_MOESM4_ESM.pdf/9465826)

Figure S3

(A)

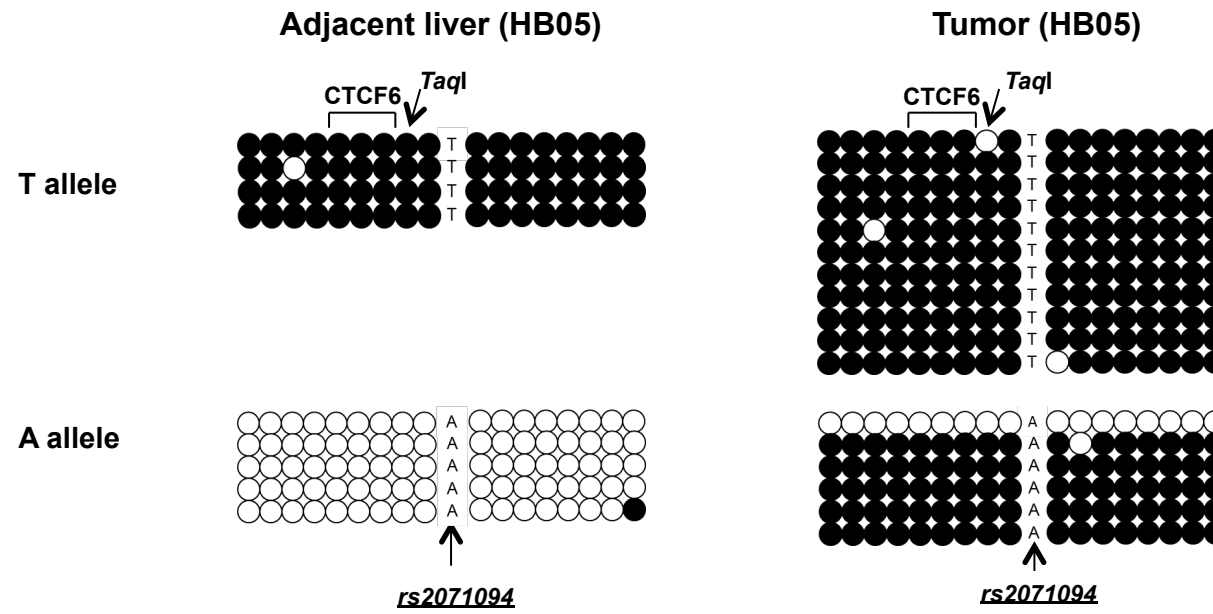

(B)

|                 | HB04 |    | HB06 |    | CL7 | CBD1 | me |
|-----------------|------|----|------|----|-----|------|----|
| Methylation (%) | un   | T  | A    | T  | A   |      |    |
|                 |      | 71 | 57   | 57 | 50  | 45   | 46 |

162 bp (Unmet)  
94 bp (Met)

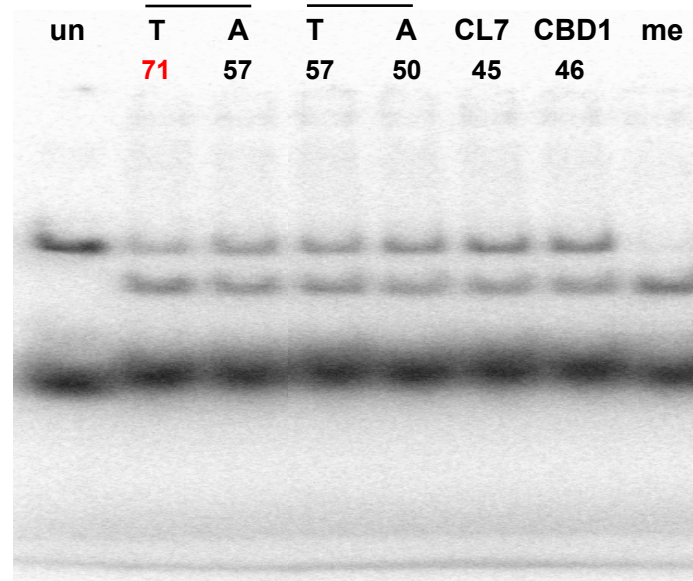

Supplement: MOESM4 [file 9465826]
